# Supplementary material for: A stable zinc–organic framework with luminescence detection of acetylacetone in aqueous solution
Source: Royal Society of Chemistry journal article supplement (doi:10.1039/c8qi01260a), 2018-11-29
Supplement: c8qi01260a1.pdf [file c8qi01260a1.pdf]

## Electronic Supplementary Information

### A Stable Zinc-Organic Framework with Luminescent Detection of Acetylacetone in Aqueous Solution

Xiao-Min Kang,<sup>a</sup> Xi-Yu Fan,<sup>a</sup> Peng-Yuan Hao,<sup>a</sup> Wen-Min Wang,<sup>b</sup> and Bin Zhao<sup>\*a</sup>

**Table S1** Selected bond lengths (Å) and bond angles (°) for compound **1**.

| <i>Bond distances</i> |            |                     |            |
|-----------------------|------------|---------------------|------------|
| Zn(1)-O(1)            | 2.042(3)   | Zn(1)-N(2)          | 2.157(4)   |
| Zn(1)-O(2)            | 2.068(3)   | O(1)-C(10)#1        | 1.267(6)   |
| Zn(1)-O(3)            | 2.129(4)   | O(2)-C(10)#2        | 1.253(6)   |
| Zn(1)-O(4)            | 2.344(4)   | C(10)-O(1)#3        | 1.267(6)   |
| Zn(1)-N(1)            | 2.125(4)   | C(21)-C(1)#4        | 1.480(8)   |
| <i>Bond Angles</i>    |            |                     |            |
| O(1)-Zn(1)-O(2)       | 121.71(13) | O(3)-Zn(1)-N(2)     | 92.00(15)  |
| O(1)-Zn(1)-O(3)       | 149.10(14) | N(1)-Zn(1)-O(3)     | 91.53(15)  |
| O(1)-Zn(1)-O(4)       | 90.39(12)  | O(3)-Zn(1)-O(4)     | 58.72(12)  |
| O(1)-Zn(1)-N(1)       | 91.60(15)  | N(1)-Zn(1)-O(4)     | 94.53(14)  |
| O(1)-Zn(1)-N(2)       | 89.69(14)  | N(1)-Zn(1)-N(2)     | 175.64(15) |
| O(2)-Zn(1)-O(3)       | 89.04(13)  | N(2)-Zn(1)-O(4)     | 89.49(14)  |
| O(2)-Zn(1)-O(4)       | 147.52(12) | C(10)#1-O(1)-Zn(1)  | 123.5(3)   |
| O(2)-Zn(1)-N(1)       | 89.76(14)  | C(10)#2-O(2)-Zn(1)  | 152.4(3)   |
| O(2)-Zn(1)-N(2)       | 87.73(14)  | O(2)#2-C(10)-O(1)#3 | 124.3(5)   |
| O(3)-Zn(1)-O(4)       | 58.72(12)  | N(3)-C(21)-C(1)#4   | 117.6(5)   |
|                       |            | C(2)-C(1)-C(21)#5   | 122.3(5)   |

Symmetry transformations used to generate equivalent atoms:

$$\#1 \ x-1/2, y-1/2, z \quad \#2 \ -x+1, -y+2, -z+1 \quad \#3 \ x+1/2, y+1/2, z$$

$$\#4 \ x+1/2, -y+3/2, z+1/2 \quad \#5 \ x-1/2, -y+3/2, z-1/2$$

<sup>a</sup> College of Chemistry and Key Laboratory of Advanced Energy Material Chemistry, Nankai University, Tianjin 300071, China. E-mail: zhaobin@nankai.edu.cn

<sup>b</sup> Department of Chemistry, Tianjin University, Tianjin 300072, China.

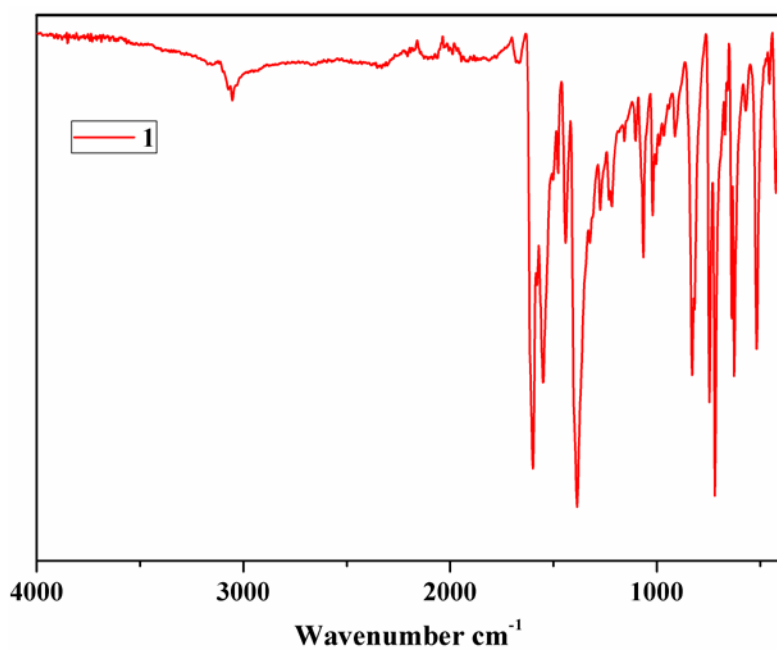

(a)

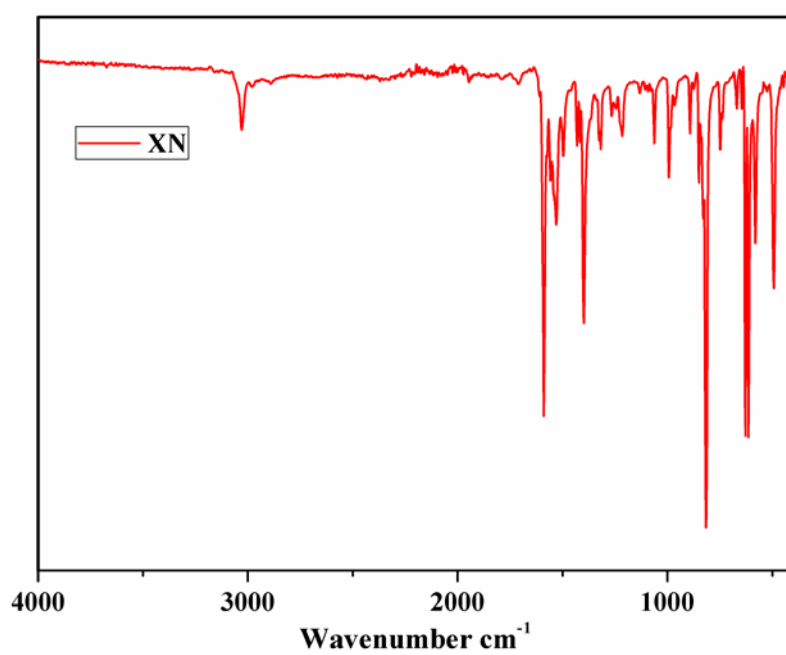

(b)

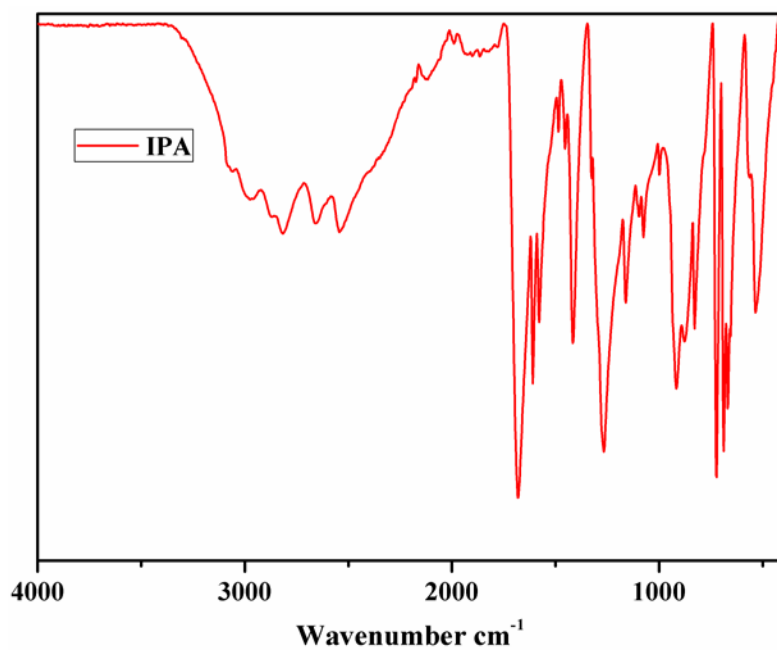

(c)

**Fig. S1** The FT-IR spectra of compound **1** and ligands. (a) for **1**, (b) for XN and (c) for IPA.

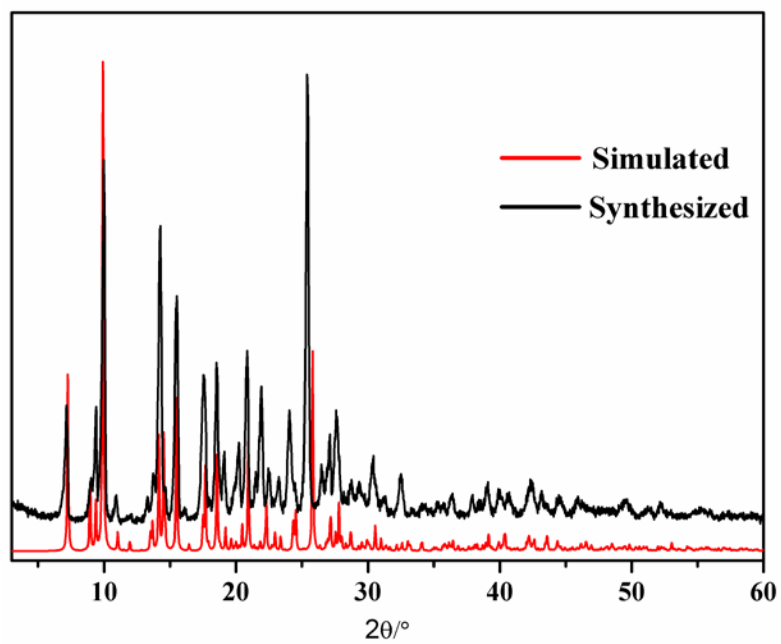

**Fig. S2** The PXRD patterns for the simulated and synthesized samples for compound **1**.

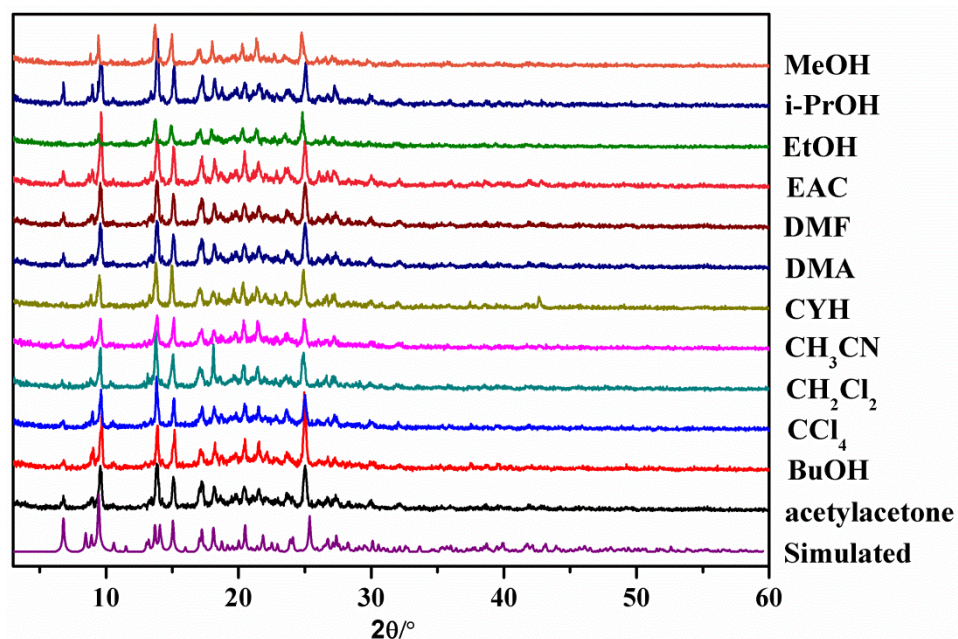

**Fig. S3** The PXRD patterns for compound **1** immersing in common organic solvents for 12 h.

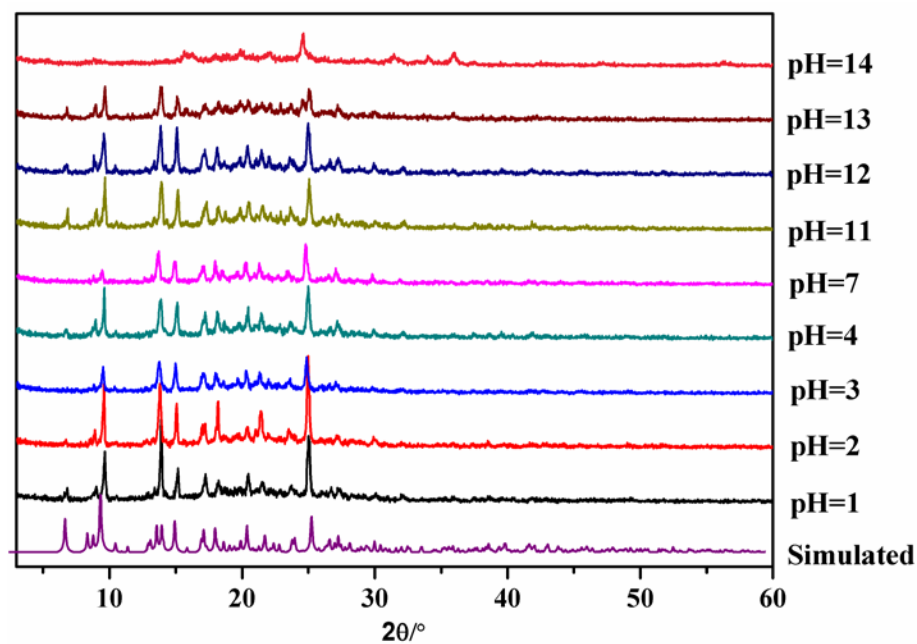

**Fig. S4** The PXRD patterns for compound **1** in various acid/base solutions with pH range from 1.0 to 14.0 for 6 h.

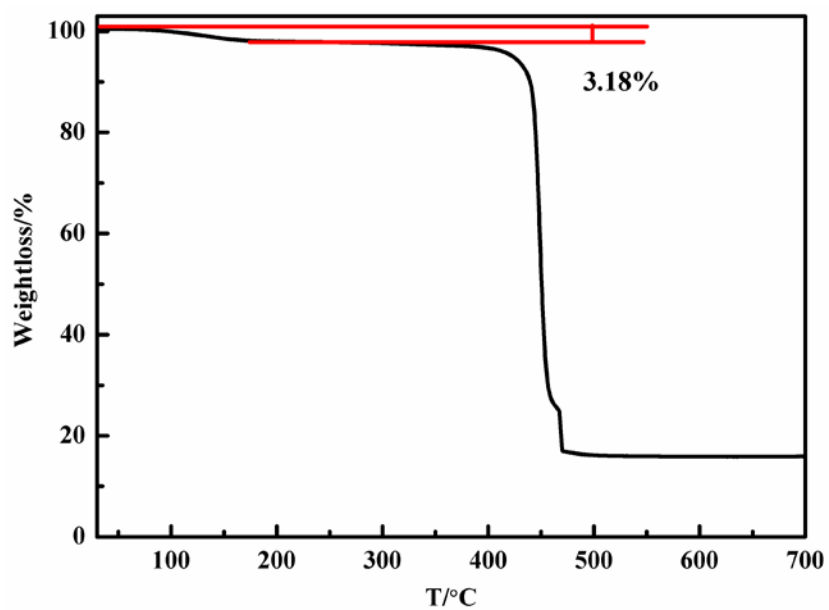

**Fig. S5** The TG curve for compound **1**.

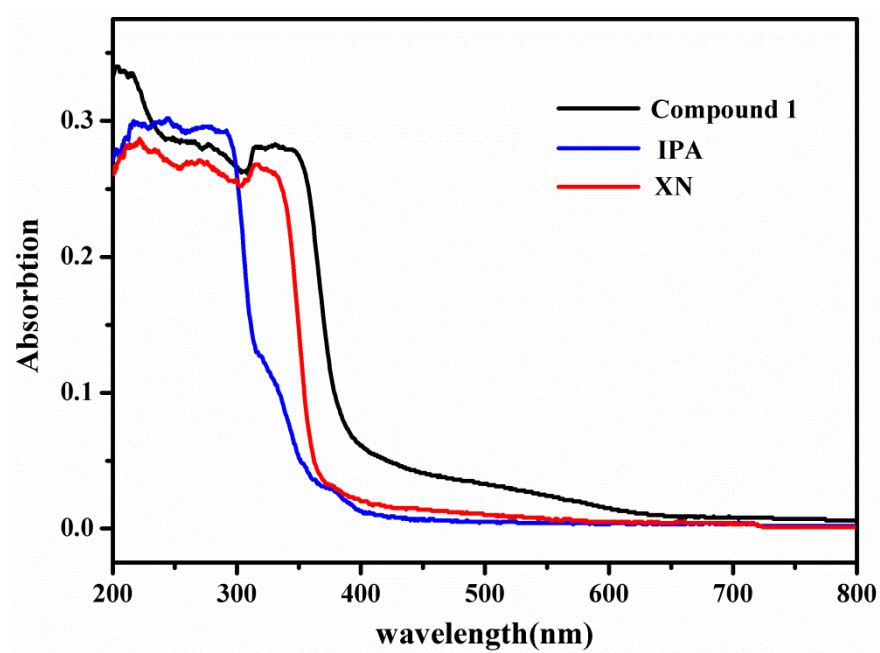

**Fig. S6** The solid-state UV spectra for compound **1** and ligands (XN and IPA). Black: compound **1**; Blue: IPA; Red: XN.

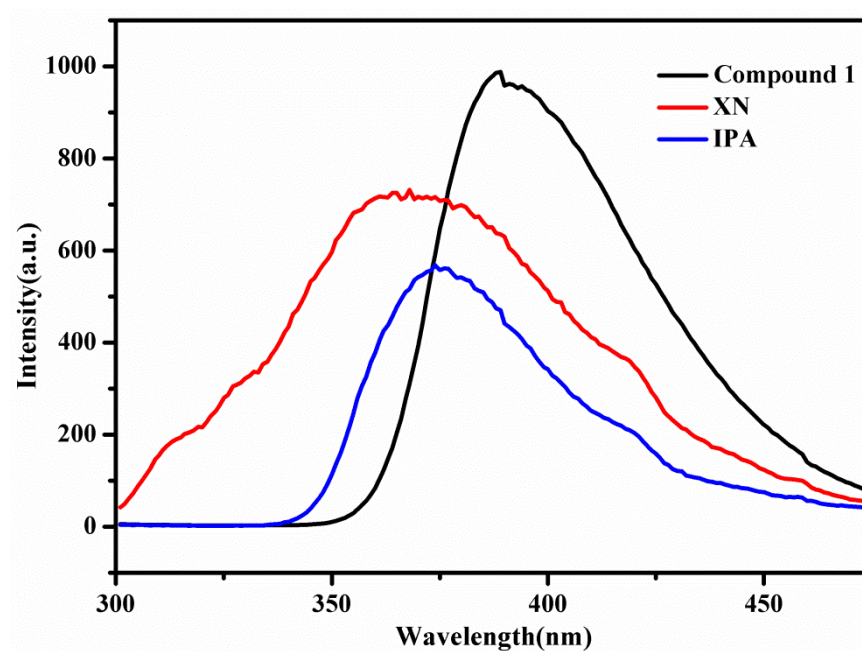

**Fig. S7** The solid-state photoluminescence spectrum for compound **1** and ligands (XN and IPA). Black: compound **1**; Blue: IPA; Red: XN.

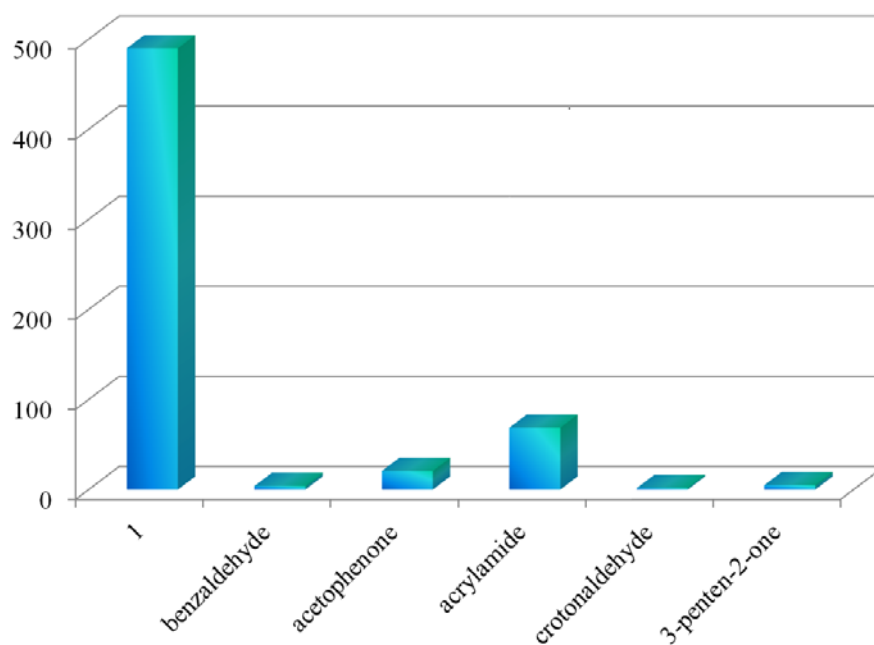

**Fig. S8** The luminescence emission of **1** in aqueous solution after the addition of benzaldehyde, acetophenone, acrylamide, crotonaldehyde and 3-penten-2-one respectively at 383 nm.

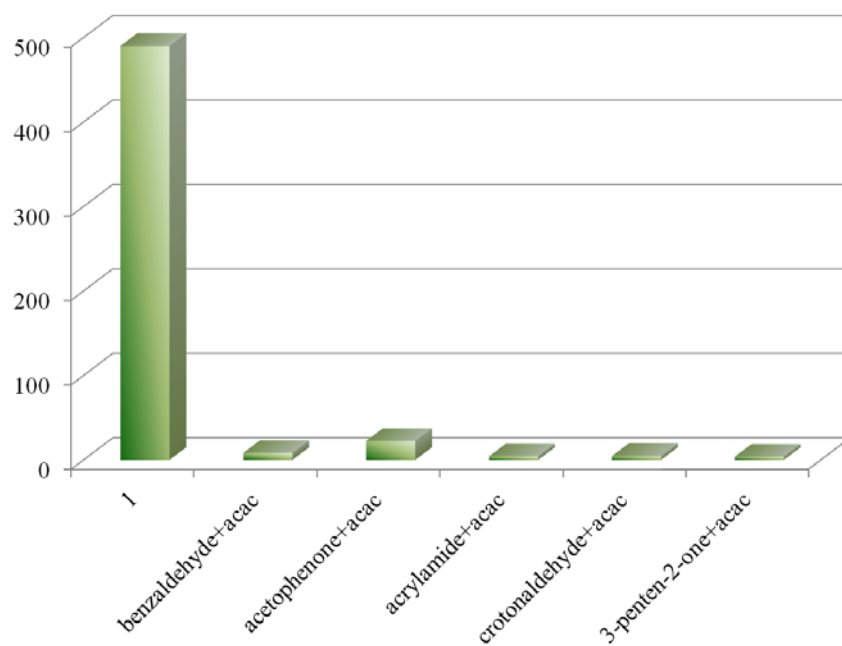

**Fig. S9** Comparison of the luminescence intensity for **1** in presence of mixed organic solvents of acac and benzaldehyde, acetophenone, acrylamide, crotonaldehyde and 3-penten-2-one respectively at 383 nm.

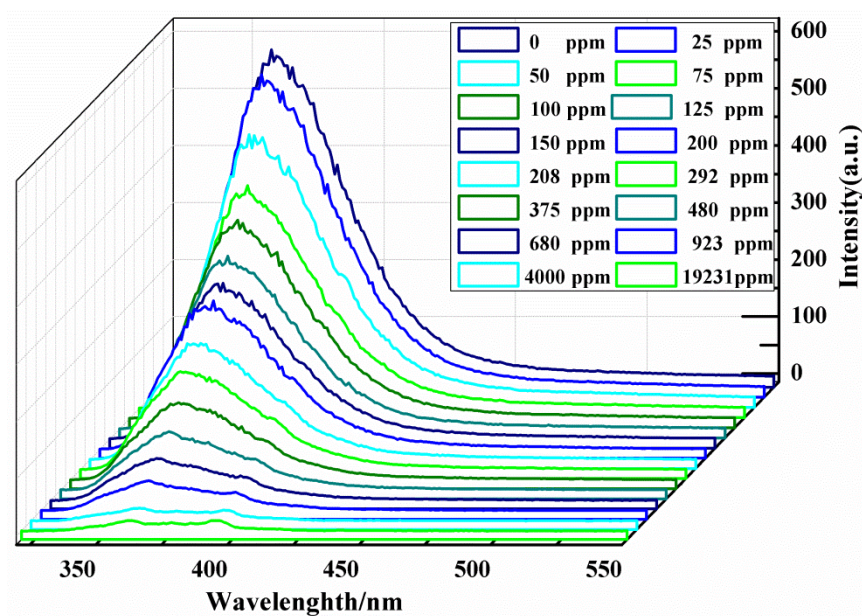

(a)



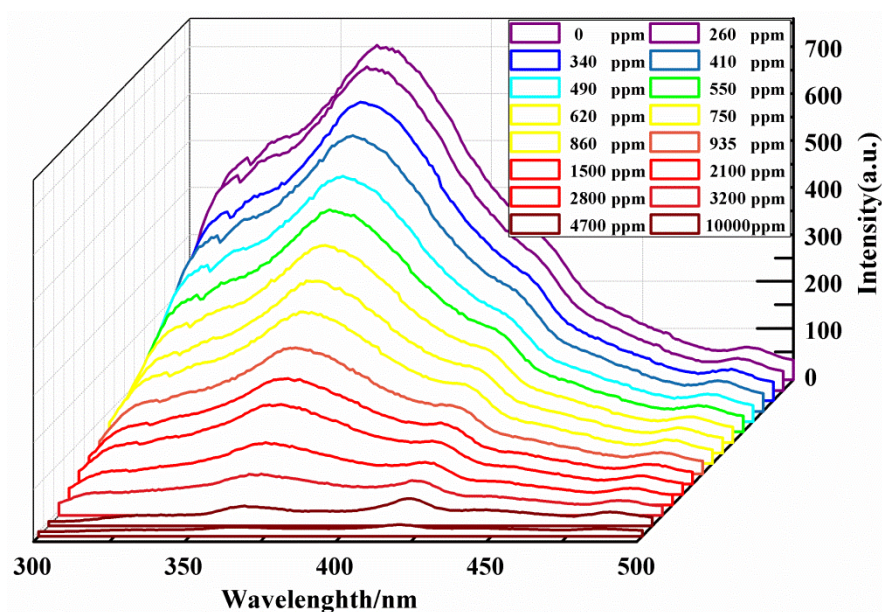

(b)

**Figure S10.** Changes in the luminescence spectrum of the systems of XN ligand (a) and IPA ligand (b) with different concentrations of acetylacetone.

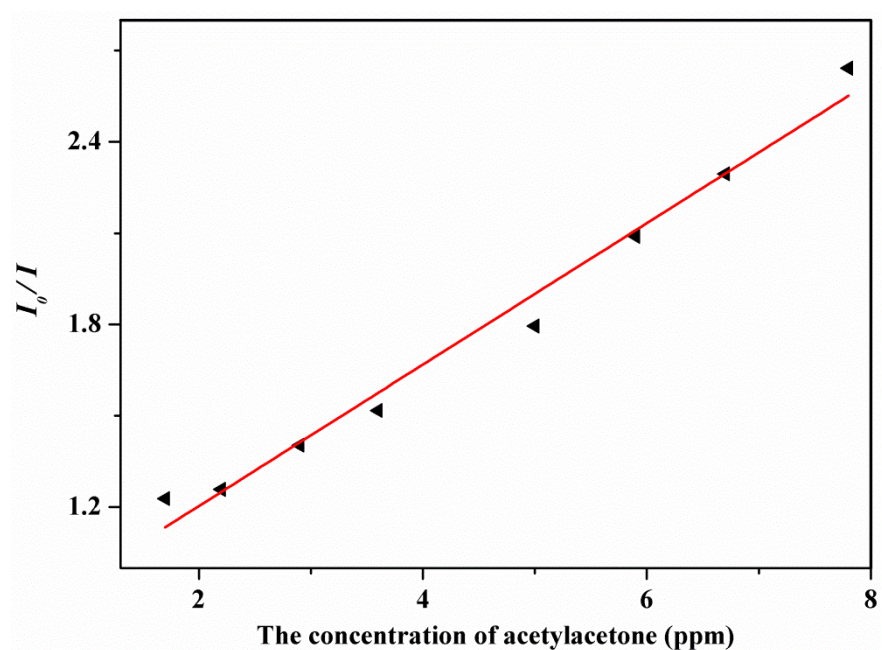

**Fig. S11** The luminescence intensity vs. acetylacetone concentration plots ( $I_0$  and  $I$  represent the luminescence intensity of compound **1** in aqueous solution before and after adding different concentration of acetylacetone, respectively;  $K_{SV}$  is the Stern Volmer constant).



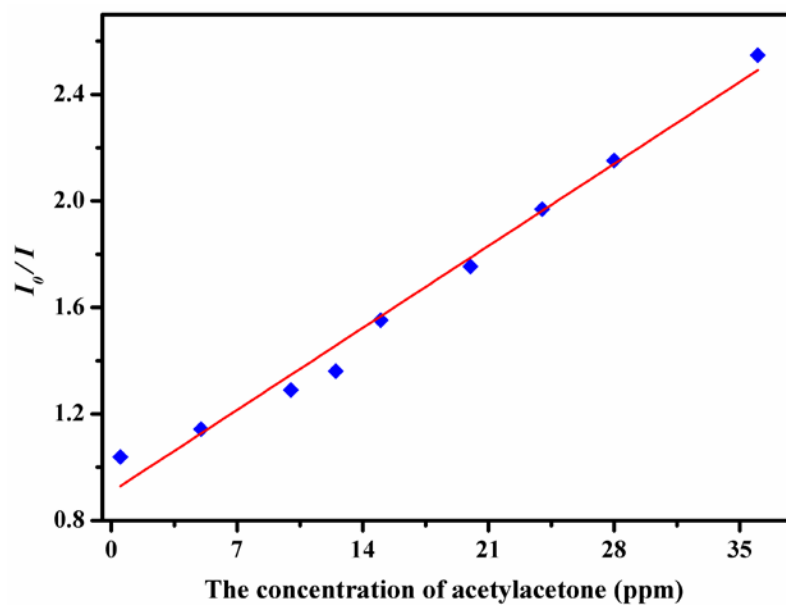

(b)

**Figure S12.** The luminescence intensity *vs.* acetylacetone concentration plots ( $I_0$  and  $I$  represent the luminescence intensity of compound **1** in organic solvent before and after adding different concentration of acetylacetone, respectively;  $K_{sv}$  is the Stern Volmer constant).

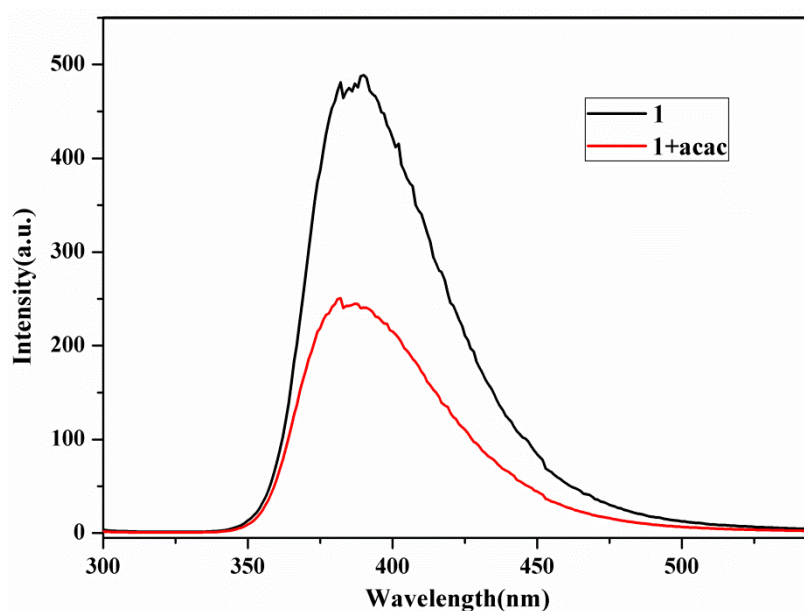

**Figure S13.** Changes of the luminescence spectrum for compound **1** in acac gas.

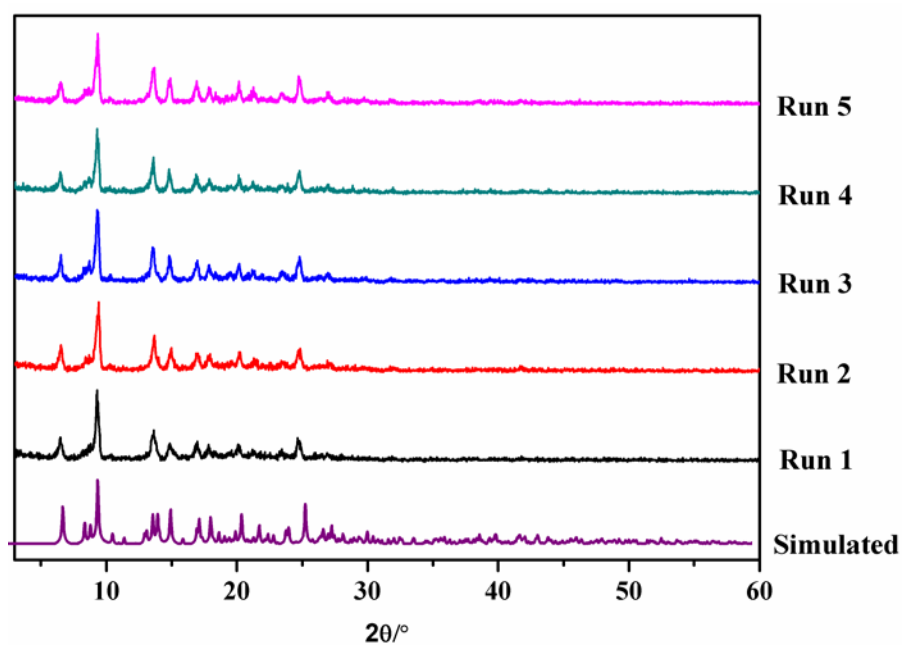

**Fig. S14** The PXRD patterns of compound **1** after luminescent recycling agree well with the simulated one.

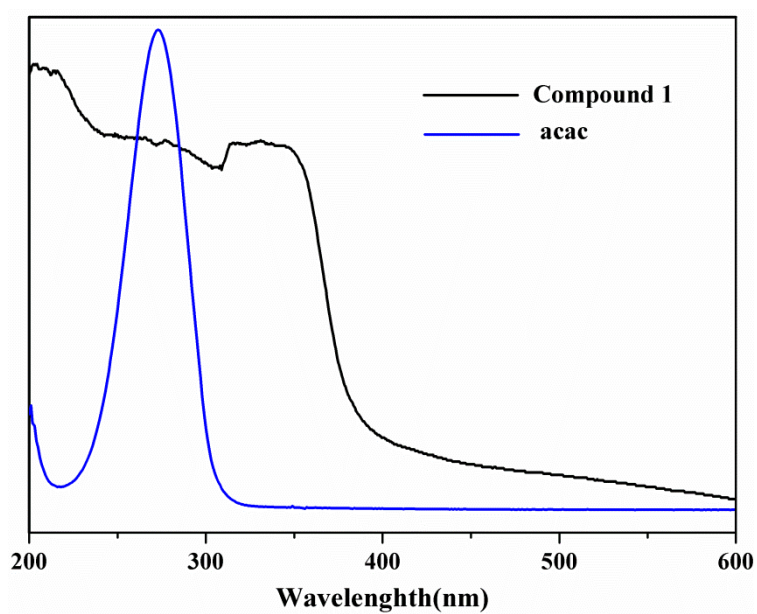

**Fig. S15** The comparison of liquid-state UV spectra of acetylacetone (blue) and the excitation spectrum of compound **1** (black).
